# Supplementary material
Source: PubMed Central journal article supplement (PMC3465424)
Supplement: 1204540109_pnas.201204540SI.pdf [file 1204540109_pnas.201204540SI.pdf]

# Supporting Information

Goueli et al. 10.1073/pnas.1204540109

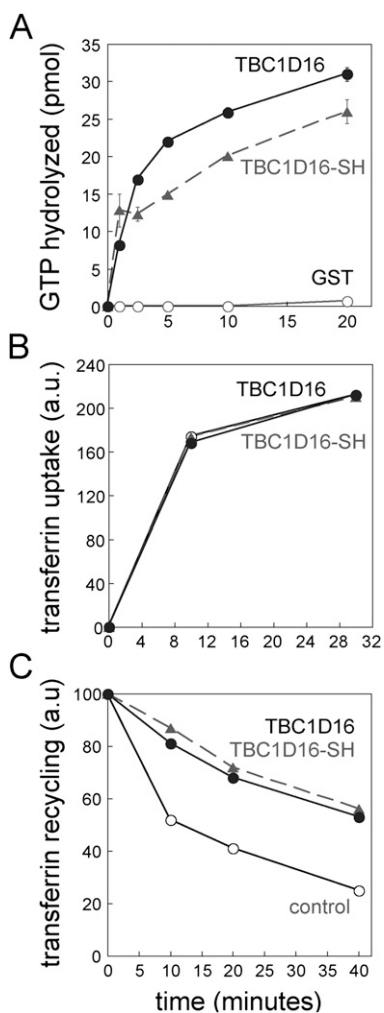

**Fig. S1.** The short isoform of TBC1D16 (TBC1D16-SH) stimulates Rab4A GTPase activity in vitro and in cells. (A) Rab4A GTPase in vitro activity of TBC1D16-SH compared with the full-length protein as in Fig. 1B. (B and C) Transferrin uptake (B) and transferrin recycling (C) in cells transfected with full-length TBC1D16 or TBC1D16-SH, as in Fig. 3.
